# Supplementary material
Source: publisher figshare collection journal article supplement (https://acs.figshare.com/ndownloader/files/3984508)
Supplement: Supplementary file 1 [file 3984508]

# Supporting Information

## Hypervalent Iodine Reagent-Mediated Reaction of [60]Fullerene with Amines

Chun-Bao Miao,<sup>\*,†</sup> Xin-Wei Lu,<sup>†</sup> Ping Wu,<sup>‡</sup> Jiaxing Li,<sup>§</sup> Wen-Long Ren,<sup>†</sup> Meng-Lei Xing,<sup>†</sup> Xiao-Qiang Sun,<sup>†</sup> and Hai-Tao Yang<sup>\*,†</sup>

<sup>†</sup> School of Petrochemical Engineering, Changzhou University, Changzhou 213164, China

<sup>‡</sup> College of Chemistry and Chemical Engineering, Key Laboratory of Coordination Chemistry and Functional Materials in Universities of Shandong, Dezhou University, Dezhou 253023, China

<sup>§</sup> Key Laboratory of Novel Thin Film Solar Cells, Institute of Plasma Physics, Chinese Academy of Sciences, P.O. Box 1126, Hefei 230031, China

Email: estally@yahoo.com and yht898@yahoo.com

|                                                                                                                                           |               |
|-------------------------------------------------------------------------------------------------------------------------------------------|---------------|
| <b><sup>1</sup>H NMR, <sup>13</sup>C NMR spectra of products .....</b>                                                                    | <b>S2-15</b>  |
| <sup>1</sup> H NMR and <sup>13</sup> C NMR spectra of <b>2a</b> <sup>1</sup> .....                                                        | S2            |
| <sup>1</sup> H NMR and <sup>13</sup> C NMR spectra of <b>3a</b> <sup>1</sup> .....                                                        | S3            |
| <sup>1</sup> H NMR and <sup>13</sup> C NMR spectra of <b>2b</b> <sup>1</sup> .....                                                        | S4            |
| <sup>1</sup> H NMR spectra of <b>3b</b> <sup>1</sup> .....                                                                                | S5            |
| <sup>1</sup> H NMR spectra of <b>2c</b> <sup>2</sup> and <b>3c</b> <sup>2</sup> .....                                                     | S6            |
| <sup>1</sup> H NMR spectra of <b>2d</b> <sup>1</sup> and <b>3d</b> <sup>1</sup> .....                                                     | S7            |
| <sup>1</sup> H NMR and <sup>13</sup> C NMR spectra of <b>3e</b> <sup>2</sup> .....                                                        | S8            |
| <sup>1</sup> H NMR and <sup>13</sup> C NMR spectra of <b>2f</b> <sup>2</sup> .....                                                        | S9            |
| <sup>1</sup> H NMR and <sup>13</sup> C NMR spectra of <b>3g</b> .....                                                                     | S10           |
| <sup>1</sup> H NMR and <sup>13</sup> C NMR spectra of <b>3h</b> .....                                                                     | S11           |
| <sup>1</sup> H NMR and <sup>13</sup> C NMR spectra of the mixture <b>4</b> and <b>2h</b> .....                                            | S12           |
| Comparison of the <sup>13</sup> C NMR spectra of the mixture <b>4</b> and <b>2h</b> with fullerooxazole and azafulleroid .....            | S13           |
| <sup>1</sup> H NMR and <sup>13</sup> C NMR spectra of <b>6a</b> <sup>3</sup> .....                                                        | S14           |
| <sup>1</sup> H NMR and <sup>13</sup> C NMR spectra of <b>7a</b> .....                                                                     | S15           |
| <sup>1</sup> H NMR and <sup>13</sup> C NMR spectra of <b>6b</b> <sup>3</sup> .....                                                        | S16           |
| <sup>1</sup> H NMR and <sup>13</sup> C NMR spectra of <b>7b</b> .....                                                                     | S17           |
| <b>Comparison of <sup>13</sup>C NMR and Uv-vis spectra of <b>7a</b> with that of reported <i>cis</i>-1-bisadducts in literature .....</b> | <b>S18</b>    |
| <b>AM1 optimized geometries and B3LYP/6-31G**//AM1 single-point energies for the eight isomers of <b>7a</b><sup>4</sup> .....</b>         | <b>S19-20</b> |

<sup>1</sup> Ulmer, L.; Mattay, J. *Eur. J. Org. Chem.* **2003**, 2933–2940. (Aziridinefullerenes **3** have a less polarity than azafulleroids **2** on TLC and the <sup>1</sup>H NMR spectrum of aziridinofullerenes **3** has a downfield shift compared to azafulleroids **2**.)

<sup>2</sup> Nagamachi, T.; Takeda, Y.; Nakayama, K.; Minakata, S. *Chem. Eur. J.* **2012**, *18*, 12035–12045.

<sup>3</sup> Ikuma, N.; Mikie, T.; Doi, Y.; Nakagawa, K.; Kokubo, K.; Oshima, T. *Org. Lett.* **2012**, *14*, 6040–6043.

<sup>4</sup> Gaussian 09 program (Revision C. 01, Gaussian, Inc., Wallingford, CT) was used in the theoretical calculations.

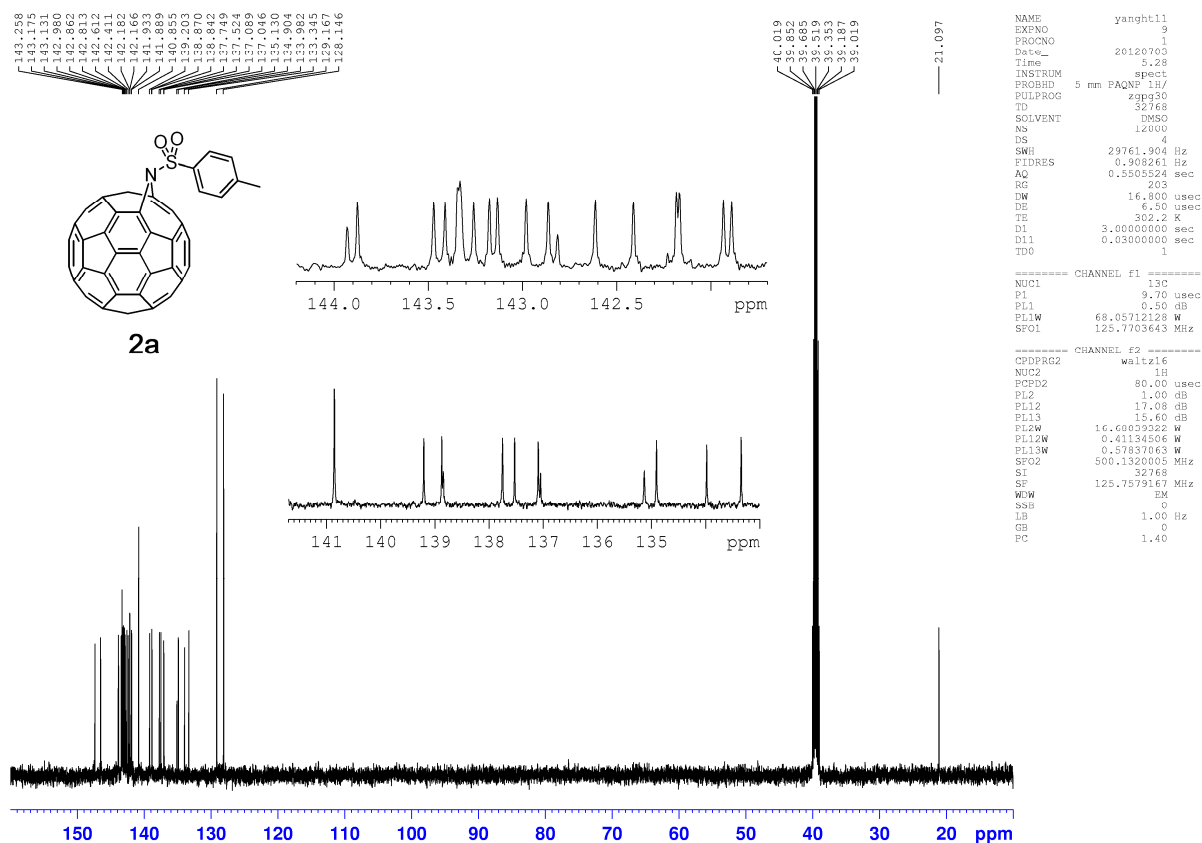



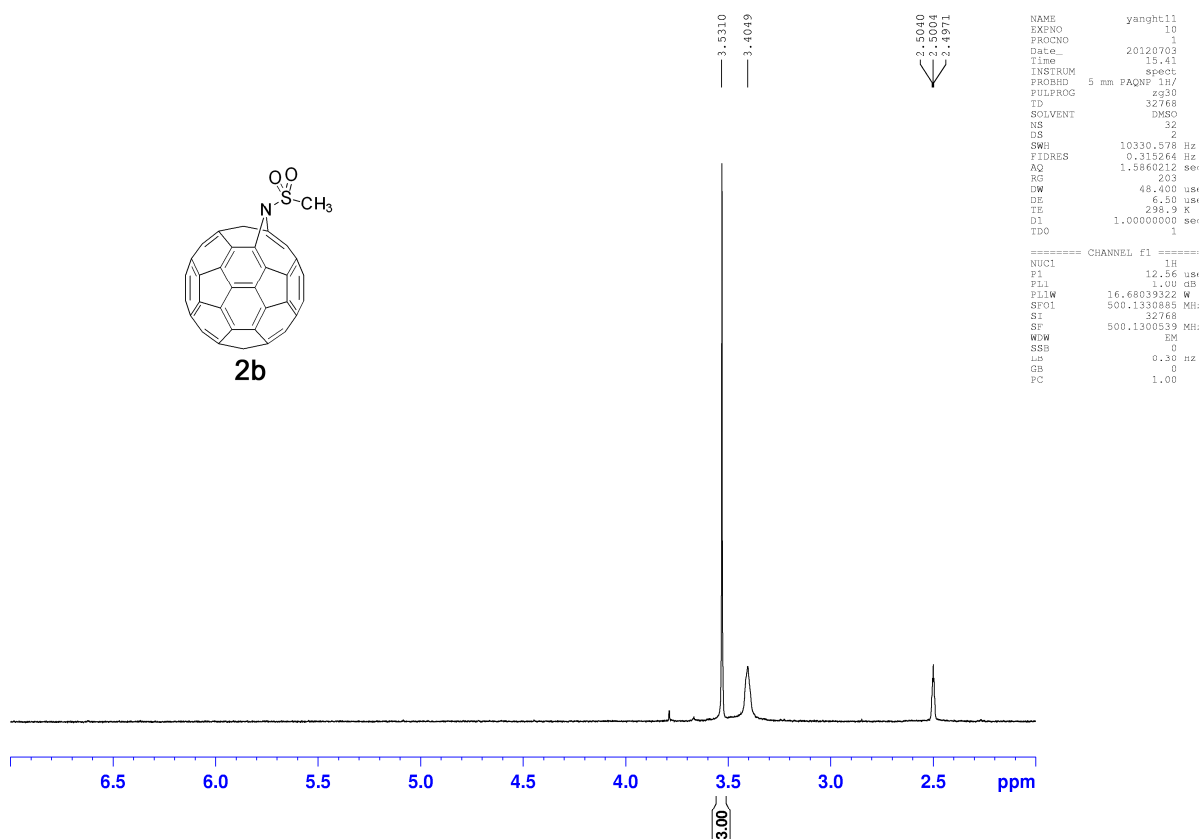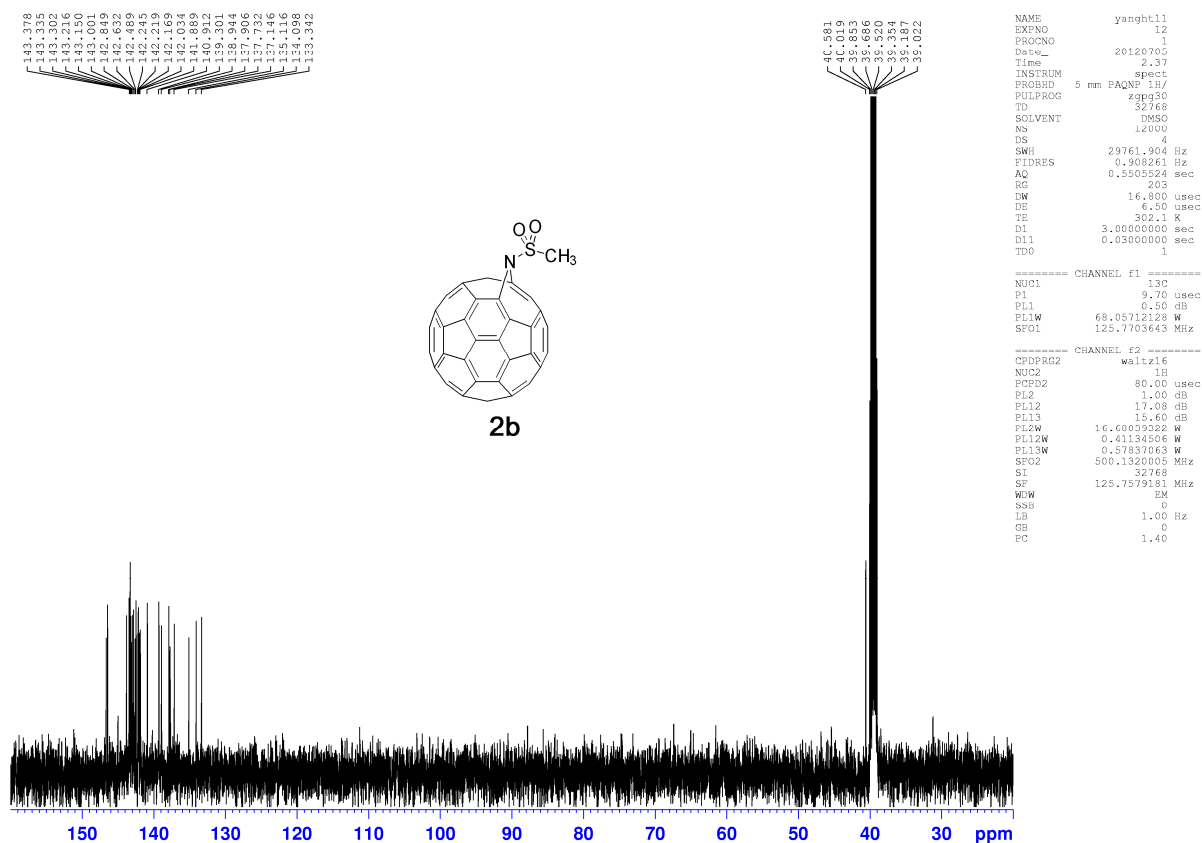

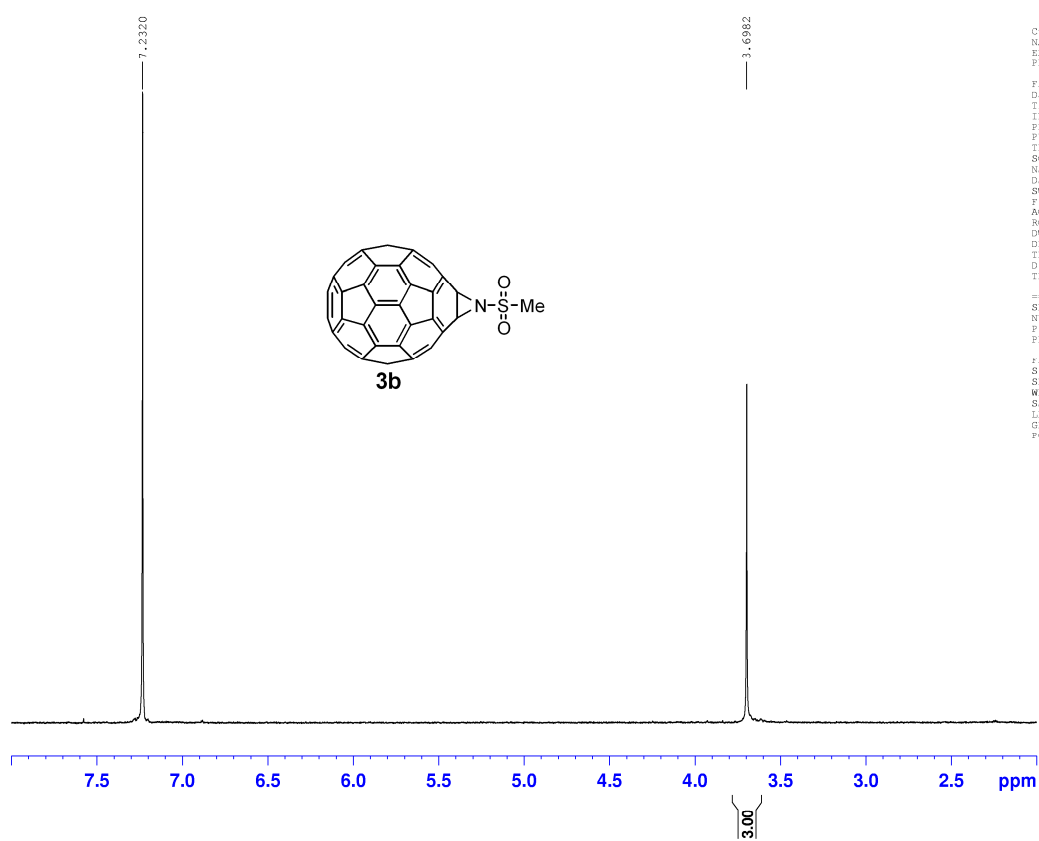

```

Current Data Parameters
NAME      3b
EXPNO     1
PROCNO    1

F2 - Acquisition Parameters
Date_     20130909
Time      14.57
INSTRUM    spect
PROBHD     5 mm PABBO BB-
PULPROG    zg30
TD          65536
SOLVENT    CDCl3
NS          6
DS          0
SWH         6009.615 Hz
FIDRES      0.091699 Hz
AQ          5.4526453 sec
RG          203
DW          83.200 usec
DE          6.50 usec
TE          293.2 K
D1          1.00000000 sec
TDO         1

===== CHANNEL f1 =====
SF01       300.1318534 MHz
NUC1        1H
P1         14.50 usec
PLW1        6.51630020 W

F2 - processing parameters
SI          65536
SF          300.1300146 MHz
WDW         EM
SSB         0
LB          0.30 Hz
GB          0
PC          1.00

```

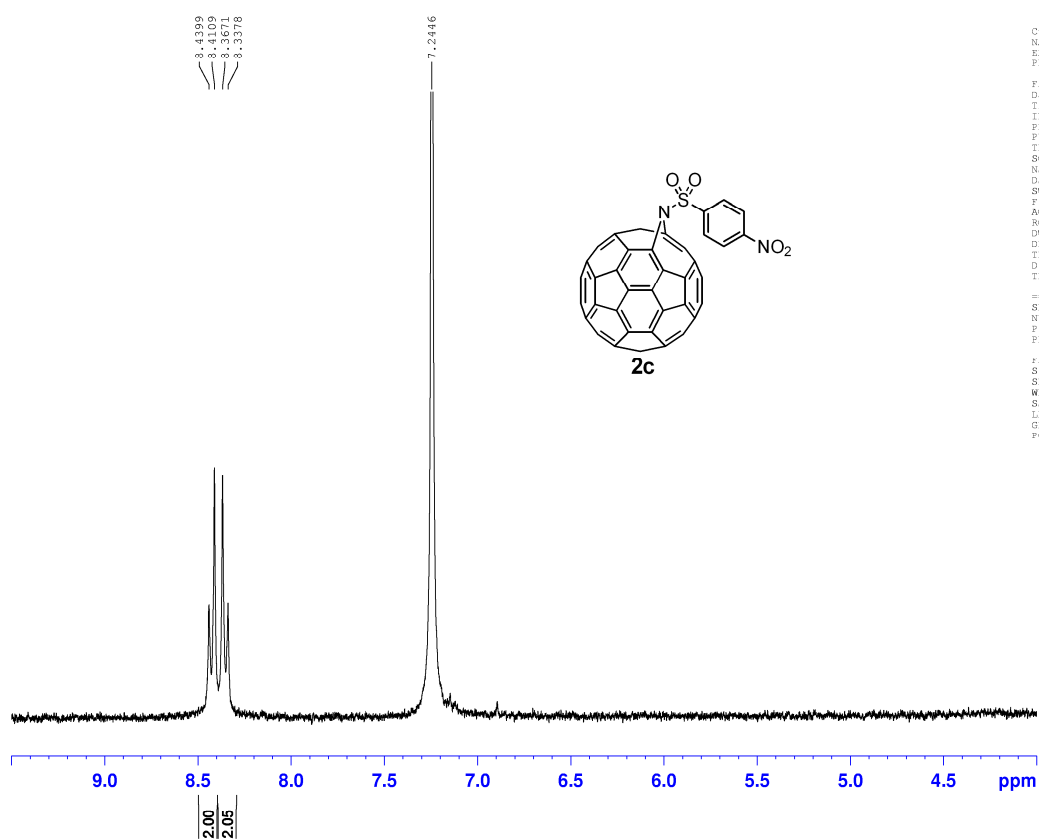

Current Data Parameters  
NAME 2c  
EXPNO 1  
PROCNO 1

F2 - Acquisition Parameters:  
Date\_ 20130909  
Time 15.52  
INSTRUM spect  
PROBHD 5 mm F4BBO BB-  
PULPROG zg30  
TD 65536  
SOLVENT CDCl3  
NS 8  
DS 0  
SWH 6009.615 Hz  
FIDRES 0.091699 Hz  
AQ 5.4526453 sec  
RG 203  
DW 85.200 usec  
DE 6.50 usec  
TE 293.2 K  
D1 1.00000000 sec  
TDO 1

===== CHANNEL f1 =====  
SF01 300.1318534 MHz  
NUC1 1H  
P1 14.50 usec  
PLW1 6.51630020 W

r2 - processing parameters  
SI 65536  
SF 300.1300110 MHz  
WDW EM  
SSB 0  
LB 0.30 Hz  
GB 0  
PC 1.00

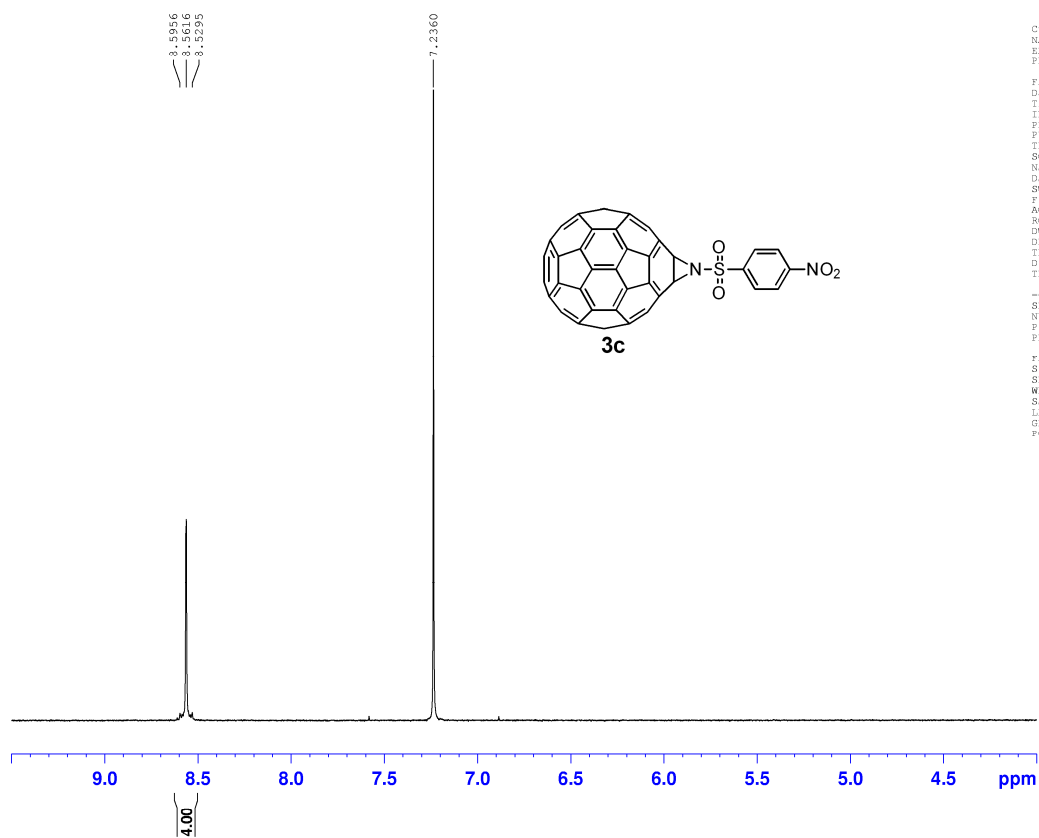

Current Data Parameters  
NAME 3c  
EXPNO 1  
PROCNO 1

F2 - Acquisition Parameters:  
Date\_ 20130909  
Time 15.06  
INSTRUM spect  
PROBHD 5 mm F4BBO BB-  
PULPROG zg30  
TD 65536  
SOLVENT CDCl3  
NS 6  
DS 0  
SWH 6009.615 Hz  
FIDRES 0.091699 Hz  
AQ 5.4526453 sec  
RG 203  
DW 85.200 usec  
DE 6.50 usec  
TE 293.2 K  
D1 1.00000000 sec  
TDO 1

===== CHANNEL f1 =====  
SF01 300.1318534 MHz  
NUC1 1H  
P1 14.50 usec  
PLW1 6.51630020 W

r2 - processing parameters  
SI 65536  
SF 300.1300136 MHz  
WDW EM  
SSB 0  
LB 0.30 Hz  
GB 0  
PC 1.00

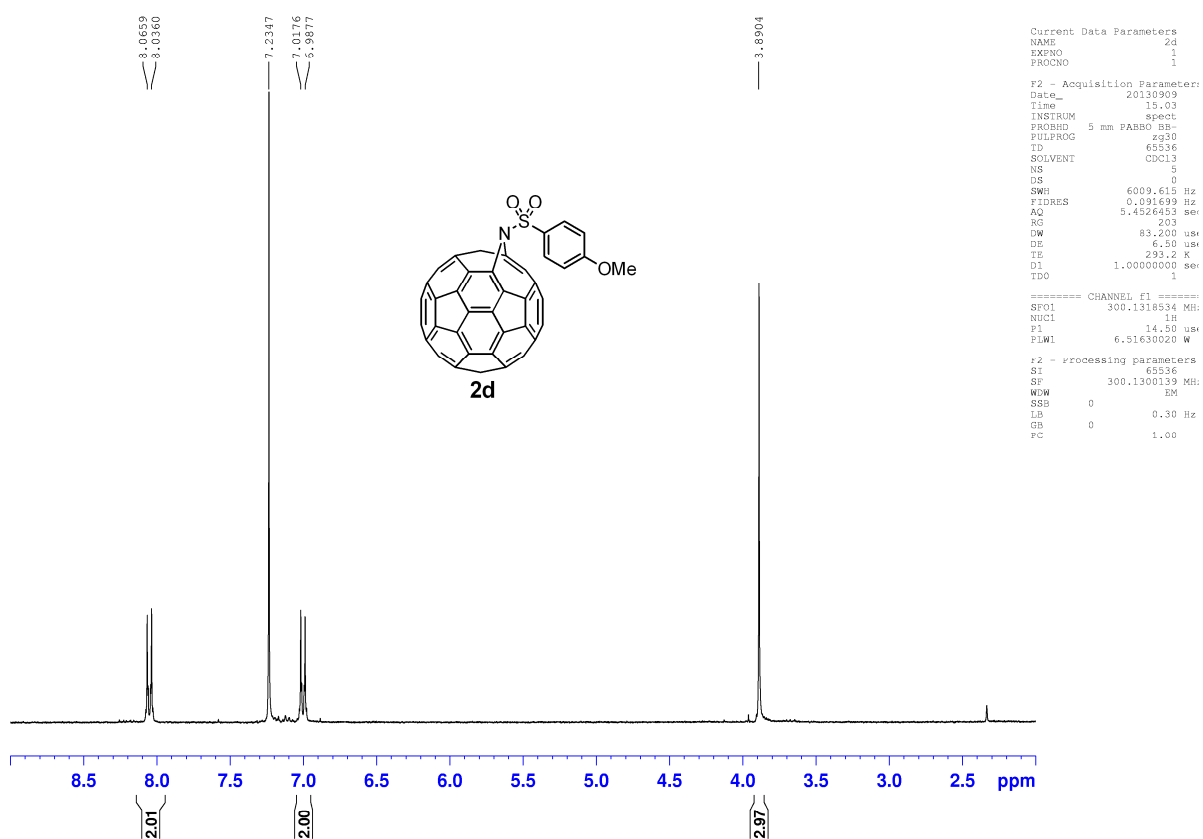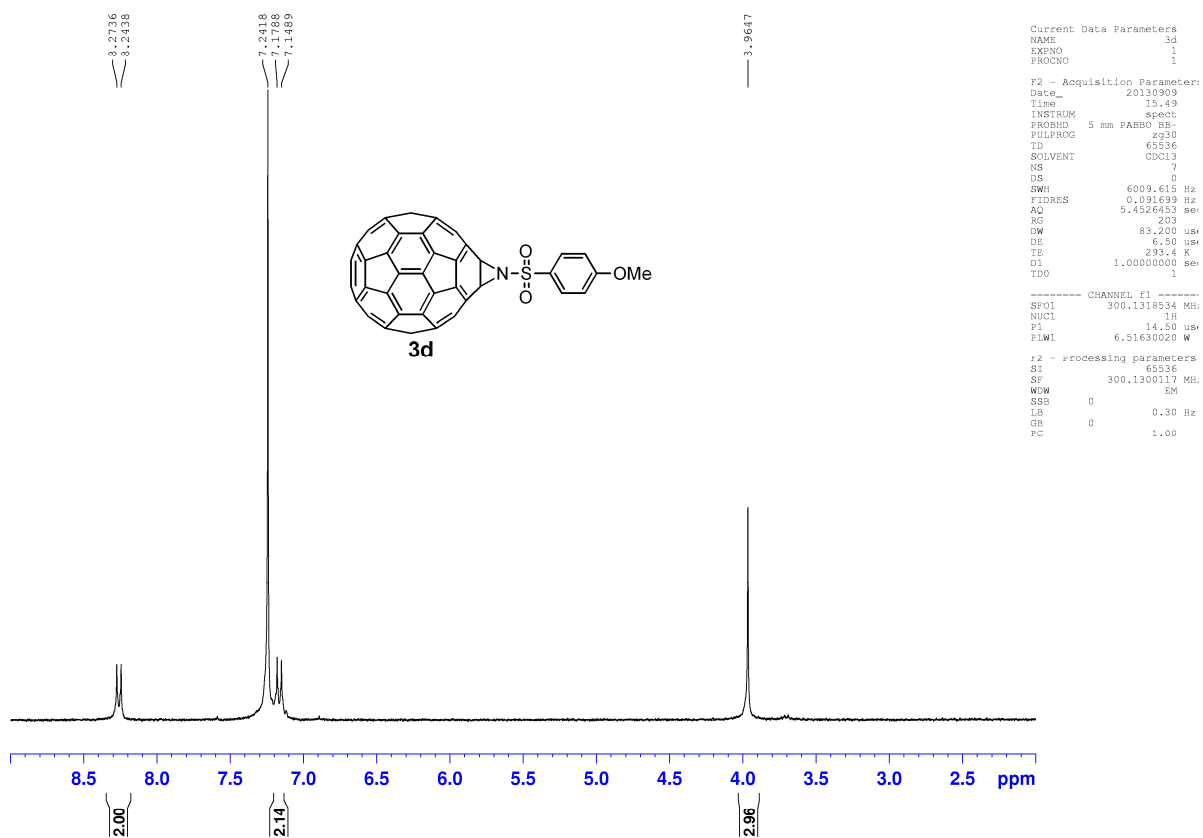





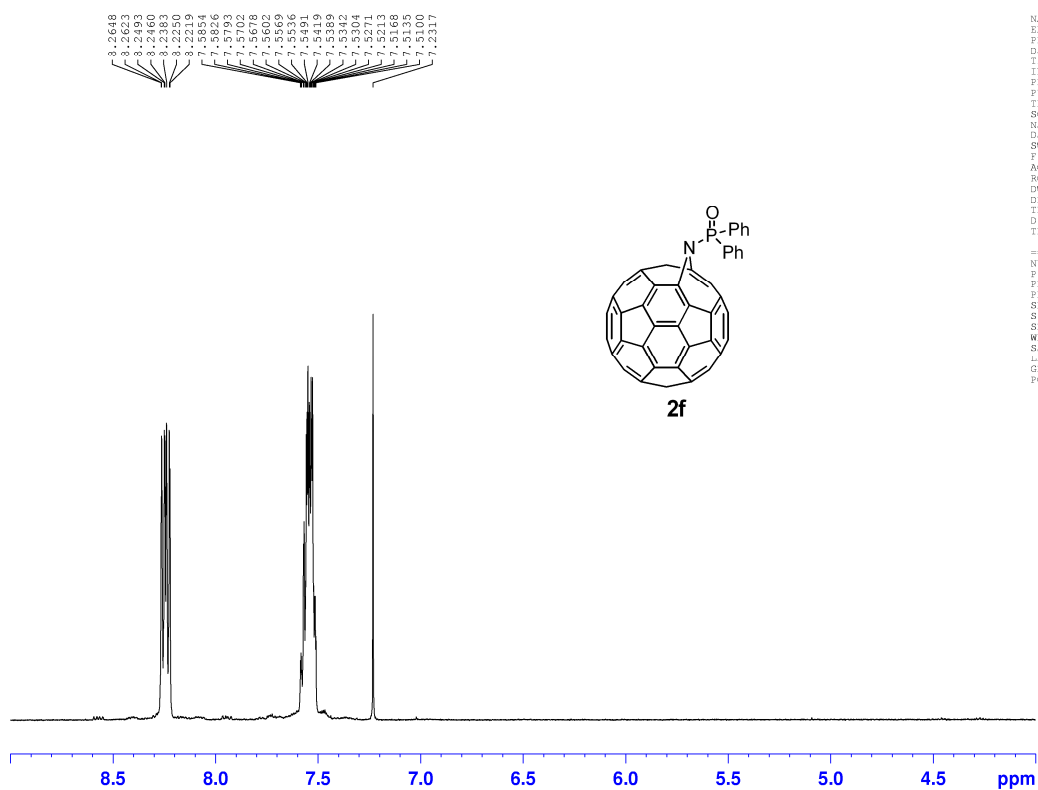

```

NAME      yanght14
EXPNO     44
PROCNO    1
Date_     20130628
Time      14.11
INSTRUM   spect
PROBHD    5 mm PAQNP 1H/
PULPROG   zg30
TD         32768
SOLVENT   CDCl3
NS         32
DS         2
SWH        10330.578 Hz
FIDRES     0.315264 Hz
AQ         1.5860212 sec
RG         203
DW         48.400 usec
DE         6.50 usec
TE         297.8 K
D1         1.00000000 sec
TD0        1
===== CHANNEL f1 =====
NUC1       1H
P1         12.56 usec
PL1        1.00 dB
PL1W       16.68039322 W
SF01       500.1330885 MHz
SI         32768
SF         500.13300276 MHz
WDW        EM
SSB        0
LB         0.30 Hz
GB         0
PC         1.00
  
```

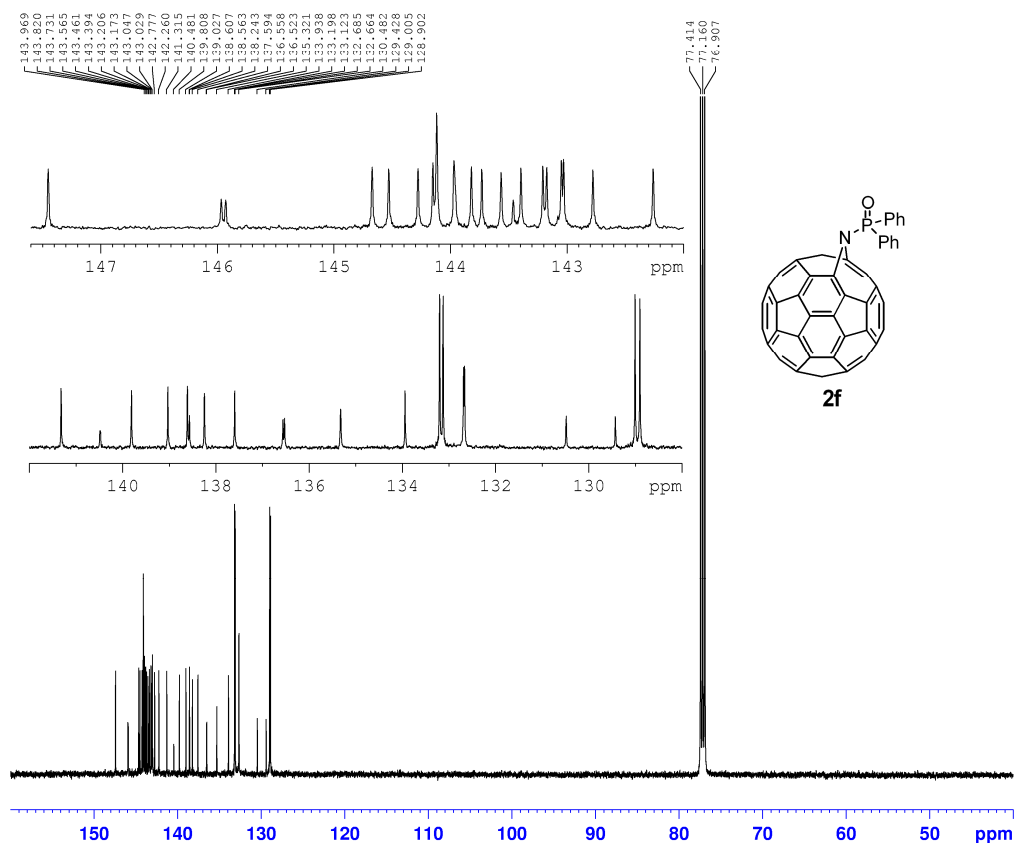

```

NAME      yanght14
EXPNO     45
PROCNO    1
Date_     20130629
Time      9.37
INSTRUM   spect
PROBHD    5 mm PAQNP 1H/
PULPROG   zgpg30
TD         32768
SOLVENT   CDCl3
NS         14000
DS         4
SWH        29761.904 Hz
FIDRES     0.908261 Hz
AQ         0.5505524 sec
RG         203
DW         16.800 usec
DE         6.50 usec
TE         301.2 K
D1         3.00000000 sec
D11        0.03000000 sec
TD0        1
===== CHANNEL f1 =====
NUC1       13C
P1         9.70 usec
PL1        0.50 dB
PL1W       68.05712128 W
SF01       125.7703643 MHz
===== CHANNEL f2 =====
CPDPRG2   waltz16
NUC2       1H
PCPD2     80.00 usec
PL2        1.00 dB
PL12       17.08 dB
PL13       15.60 dB
PL2W       16.60000022 W
PL12W      0.41134506 W
PL13W      0.57837063 W
SF02       500.1320005 MHz
SI         32768
SF         125.7578100 MHz
WDW        EM
SSB        0
LB         1.00 Hz
GB         0
PC         1.40
  
```

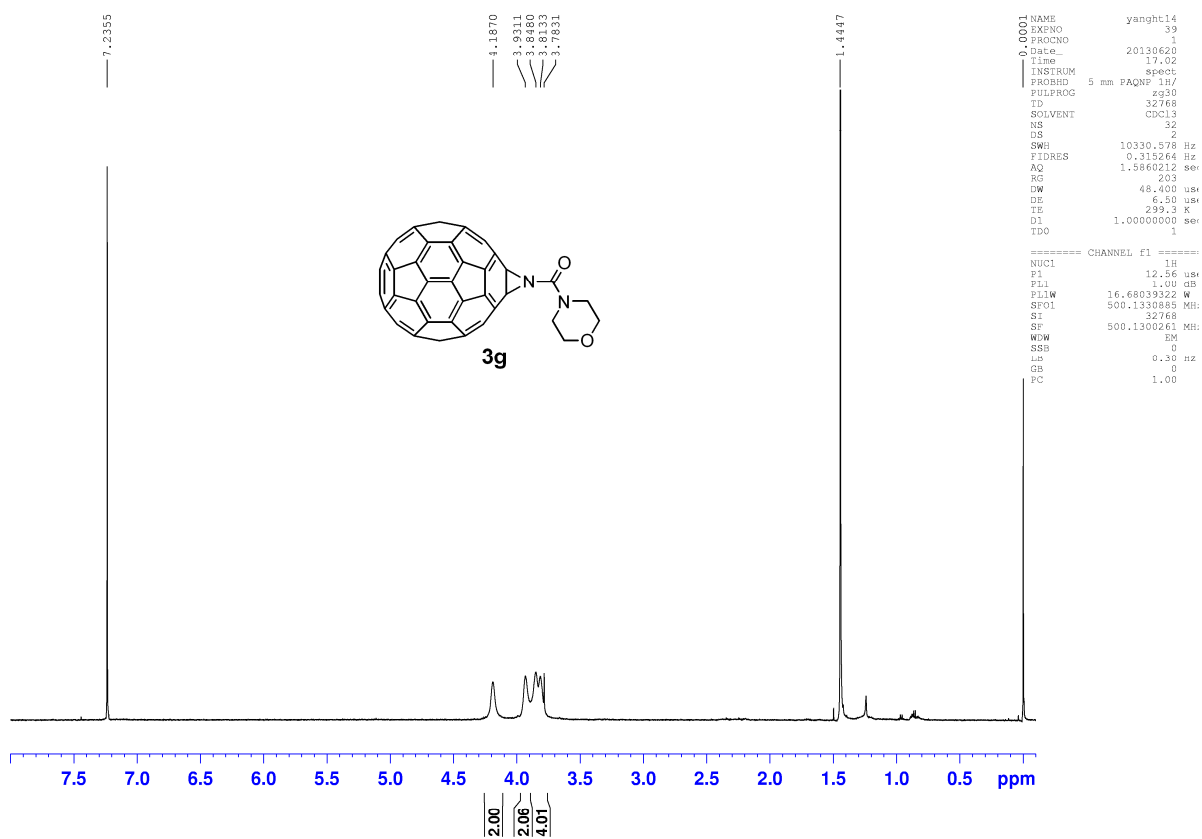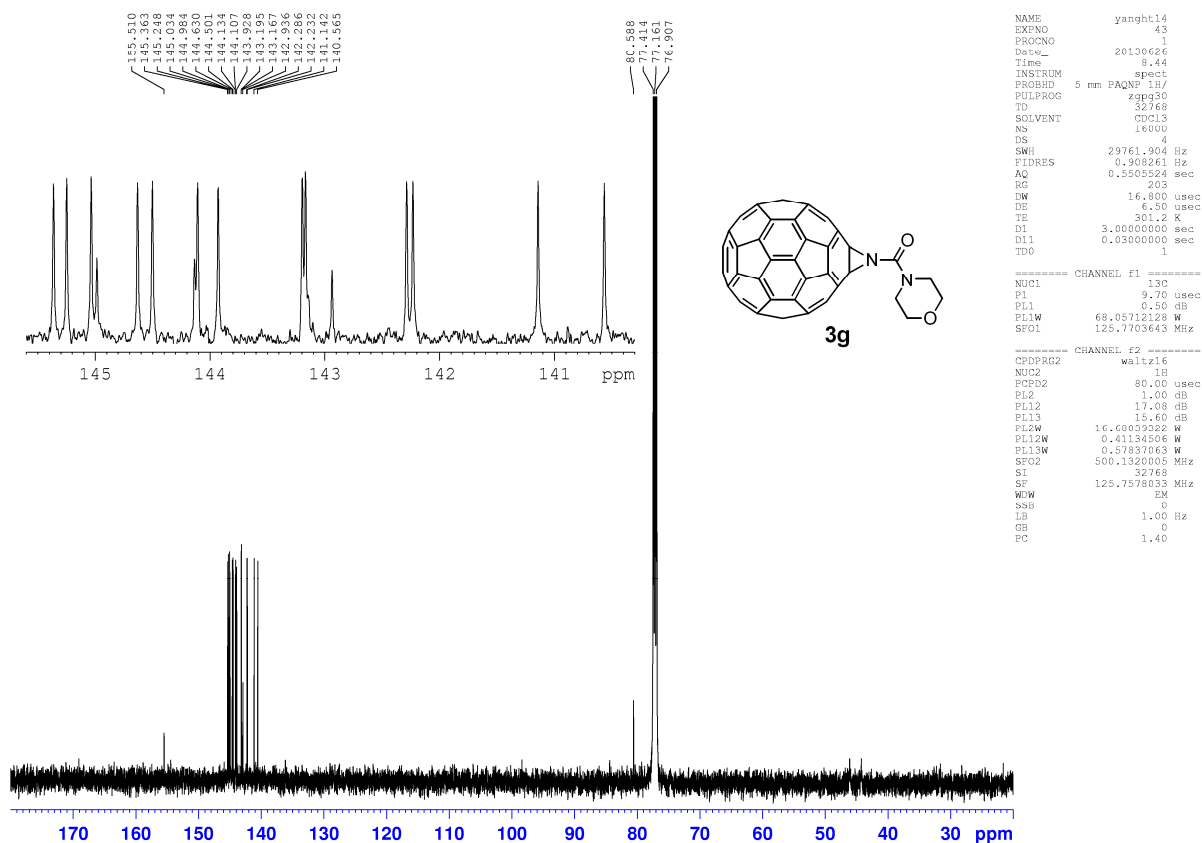

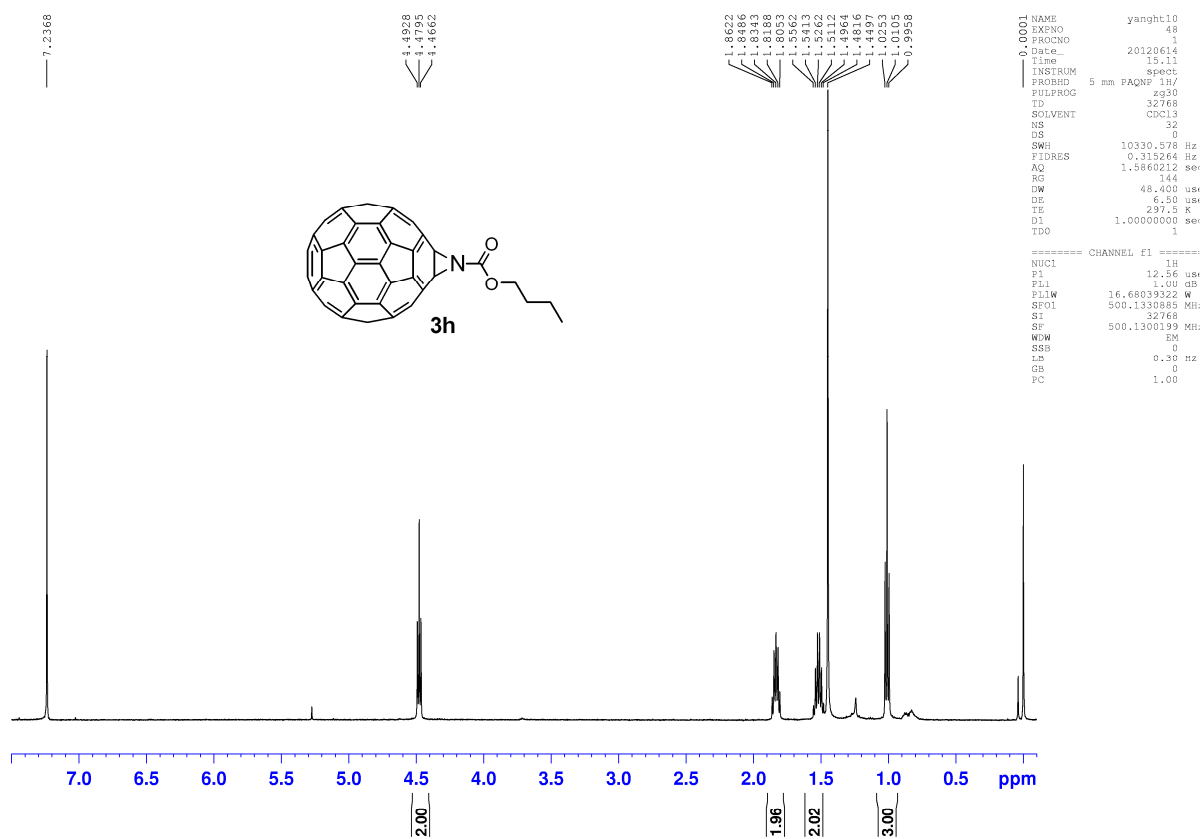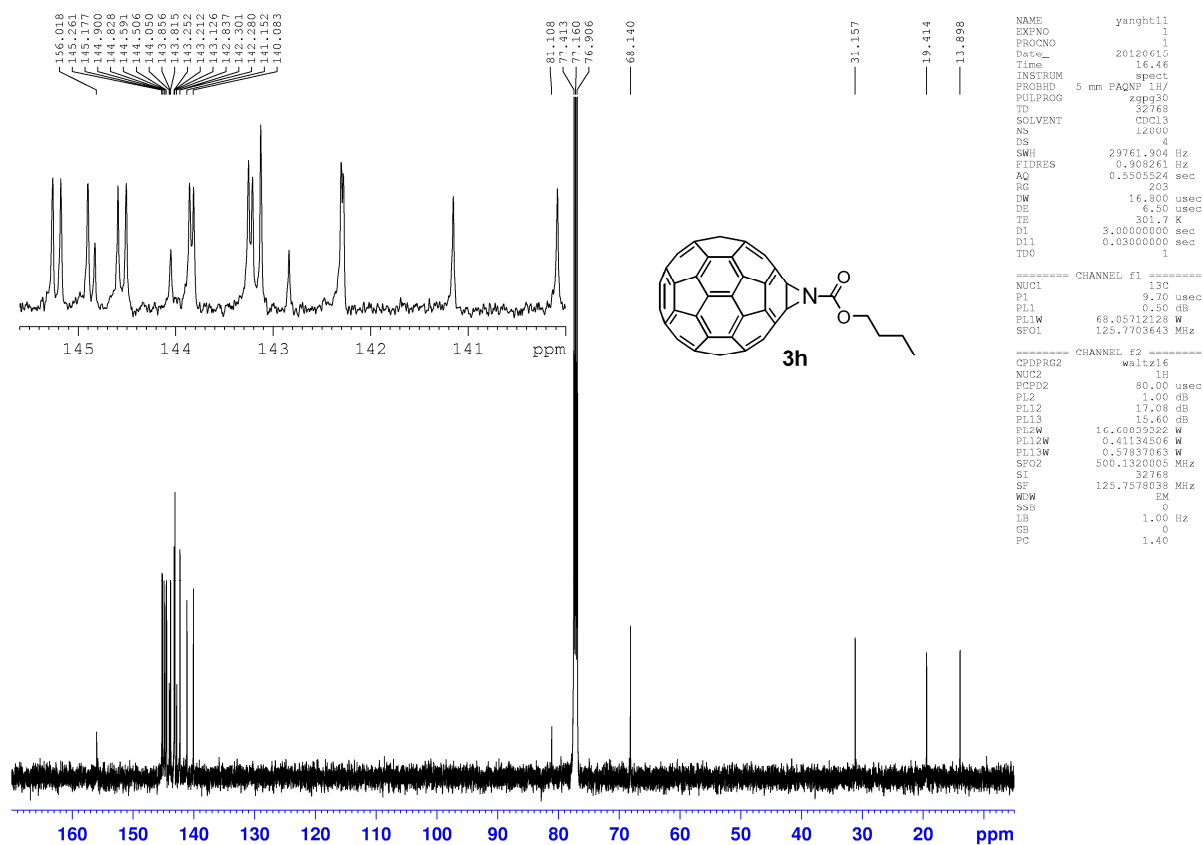

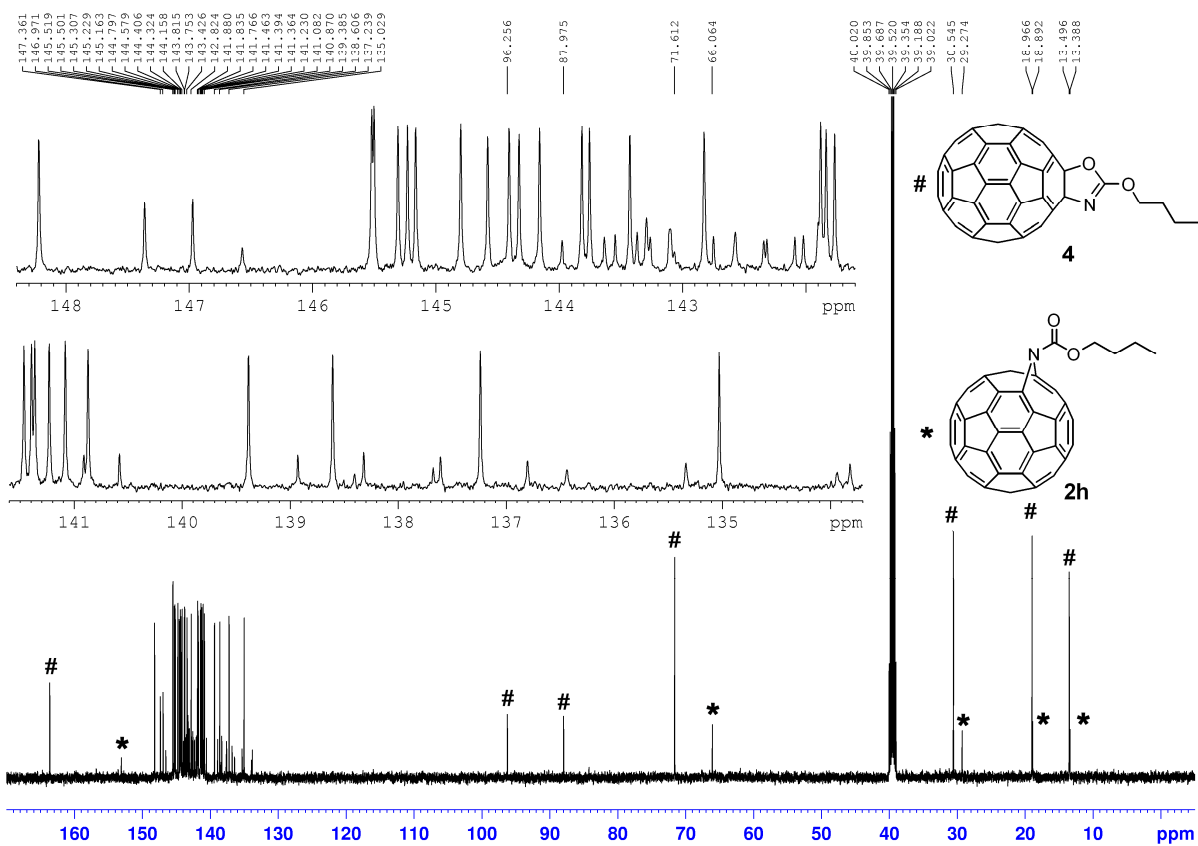

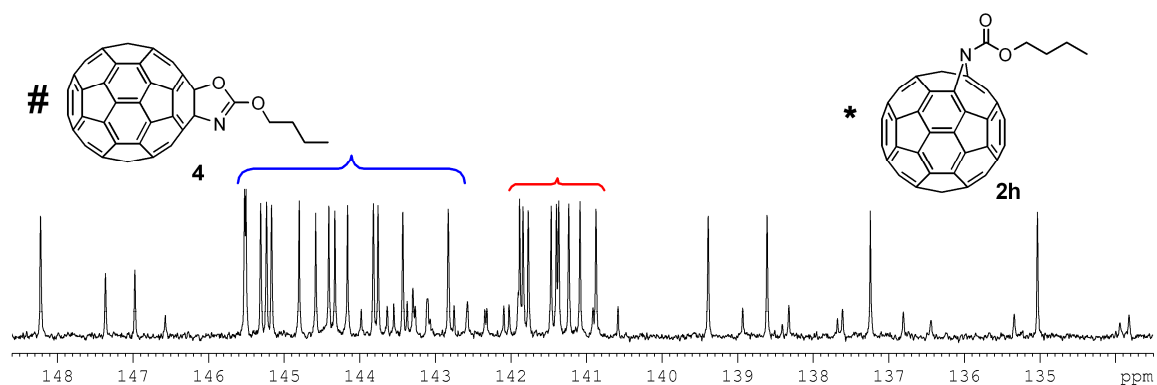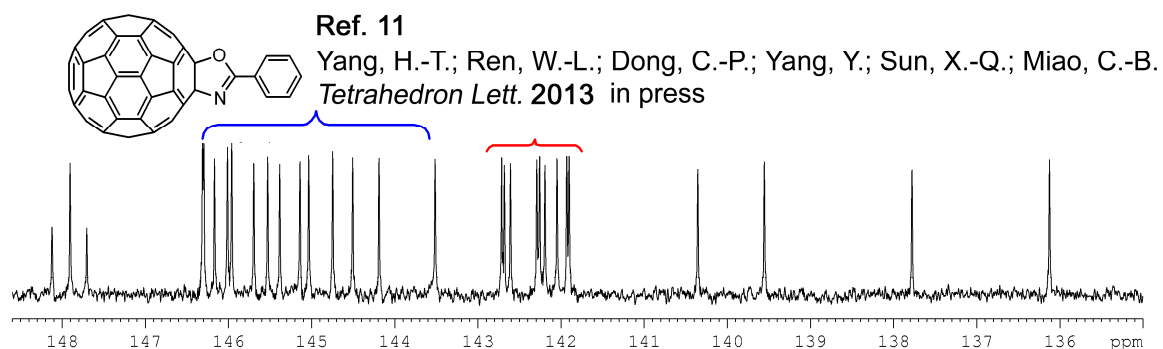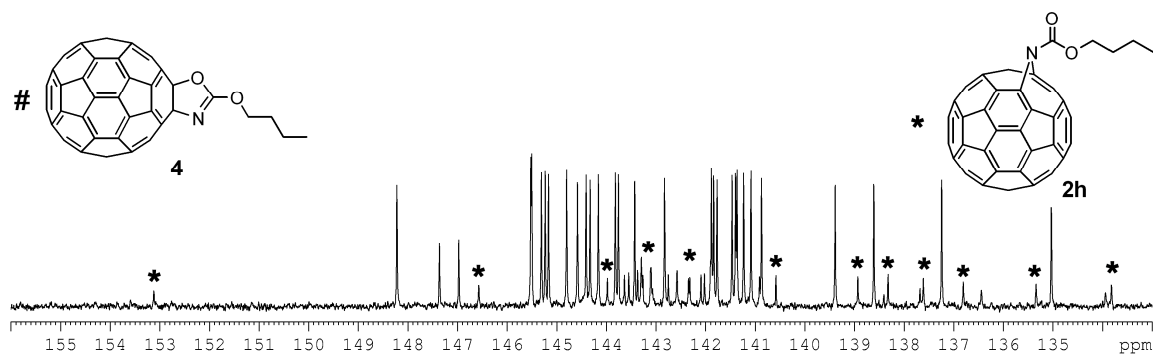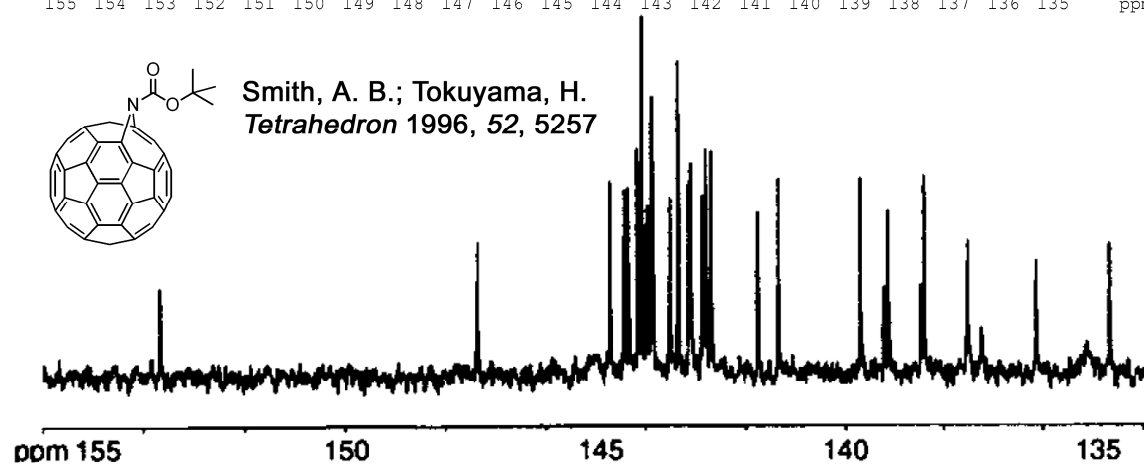

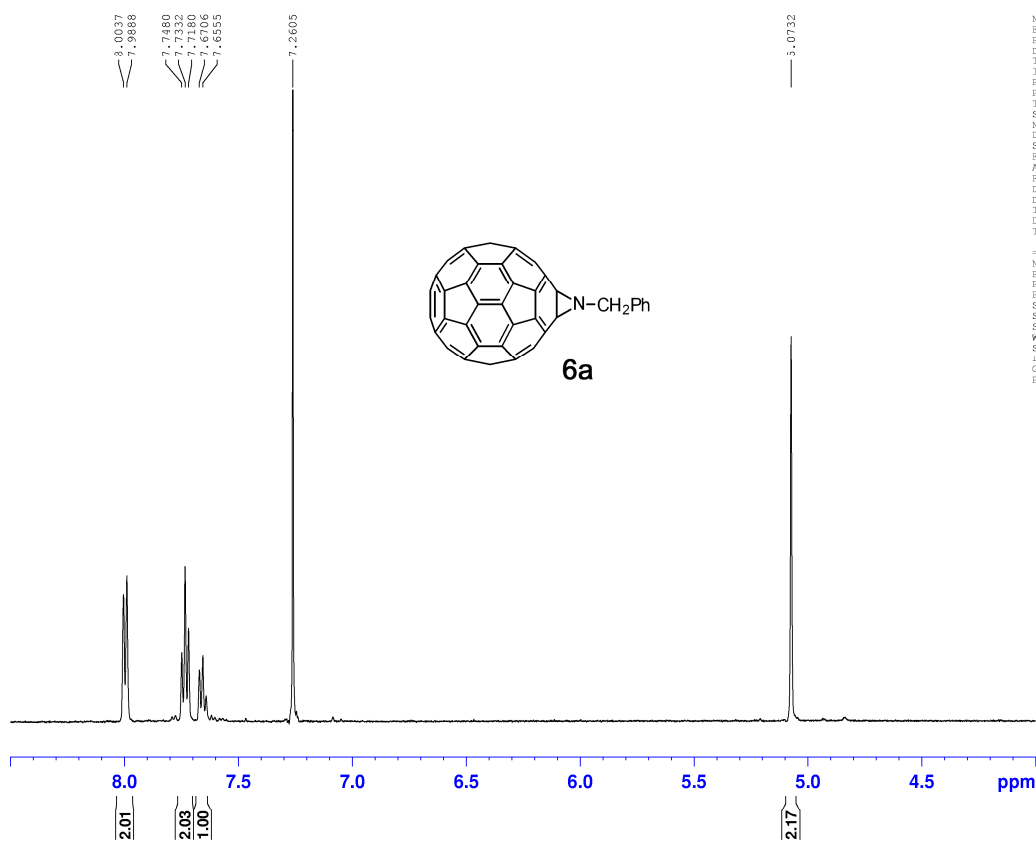

```

NAME      yanght10
EXPNO     31
PROCNO    1
Date_     20120525
Time      18.02
INSTRUM   spect
PROBHD    5 mm PAQNP 1H/
PULPROG   zg30
TD         32768
SOLVENT   CDCl3
NS         32
DS         0
SWH        10330.578 Hz
FIDRES     0.315264 Hz
AQ         1.5860112 sec
RG         144
DW         48.400 usec
DE         6.50 usec
TE         297.3 K
D1         1.00000000 sec
TD0        1

===== CHANNEL f1 =====
NUC1       1H
P1         12.56 usec
PL1        1.00 dB
PL1W       16.68039322 W
SFO1       500.1330885 MHz
SI         32768
SF         500.13300076 MHz
WDW        EM
SSB        0
GB         0.10 Hz
PC         1.00
  
```

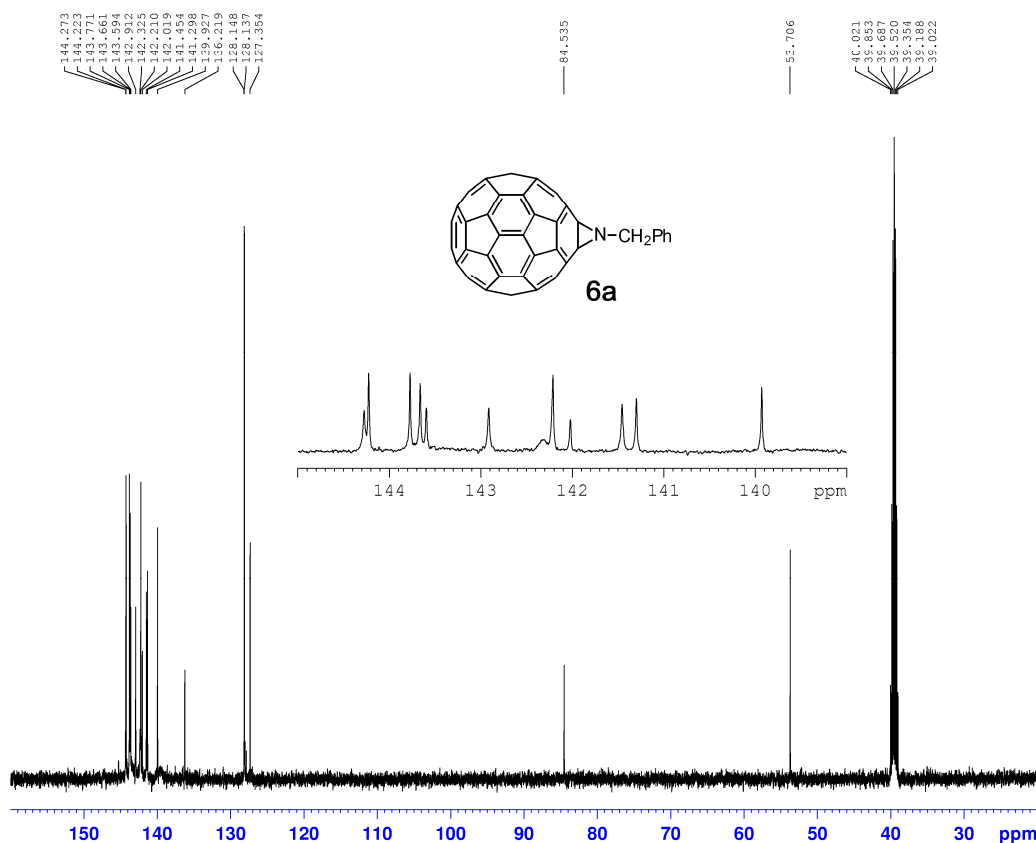

```

NAME      yanght10
EXPNO     39
PROCNO    20120603
Date_     3.07
INSTRUM   spect
PROBHD    5 mm PAQNP 1H/
PULPROG   zgpg30
TD         32768
SOLVENT   DMSO
NS         12000
DS         4
SWH        27761.904 Hz
FIDRES     0.908261 Hz
AQ         0.5505524 sec
RG         203
DW         16.800 usec
DE         6.50 usec
TE         302.1 K
D1         2.50000000 sec
D11        0.03000000 sec
TD0        1

===== CHANNEL f1 =====
NUC1       13C
P1         9.70 usec
PL1        0.50 dB
PL1W       68.05712128 W
SFO1       125.7703643 MHz

===== CHANNEL f2 =====
CPDPRG2   waltz16
NUC2       1H
PCPD2     80.00 usec
PL2        1.00 dB
PL12       17.08 dB
PL13       15.40 dB
PL2W       16.68039322 W
PL12W      0.41134506 W
PL13W      0.37837063 W
SFO2       500.1320005 MHz
SI         32768
SF         125.7579175 MHz
WDW        EM
SSB        0
GB         1.00 Hz
PC         1.40
  
```

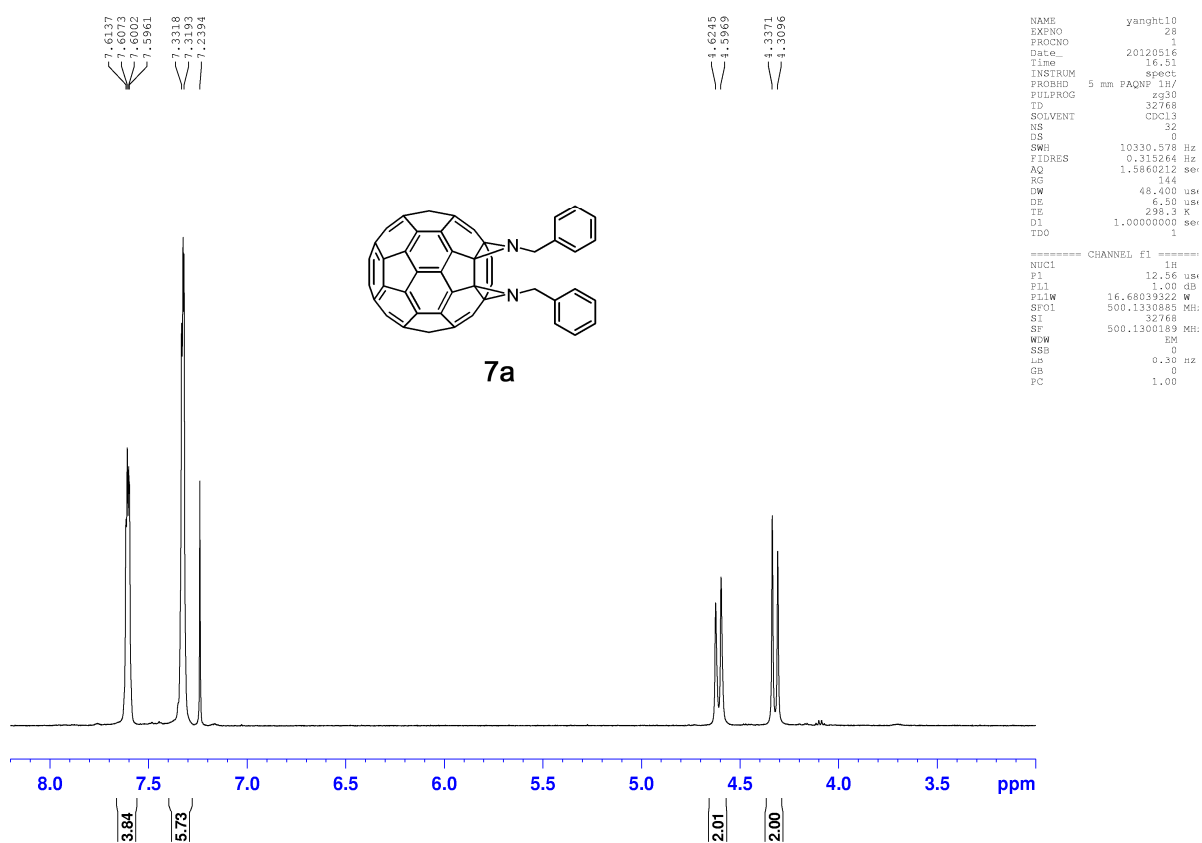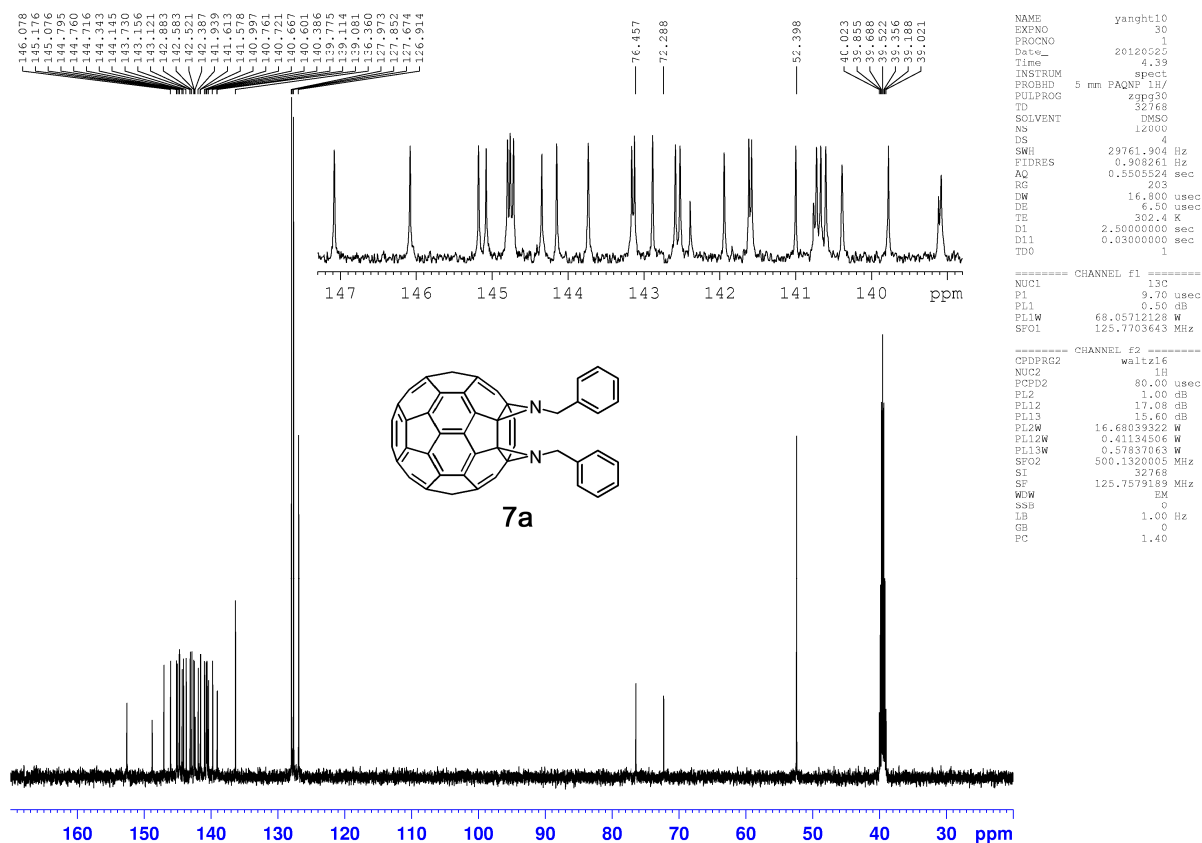

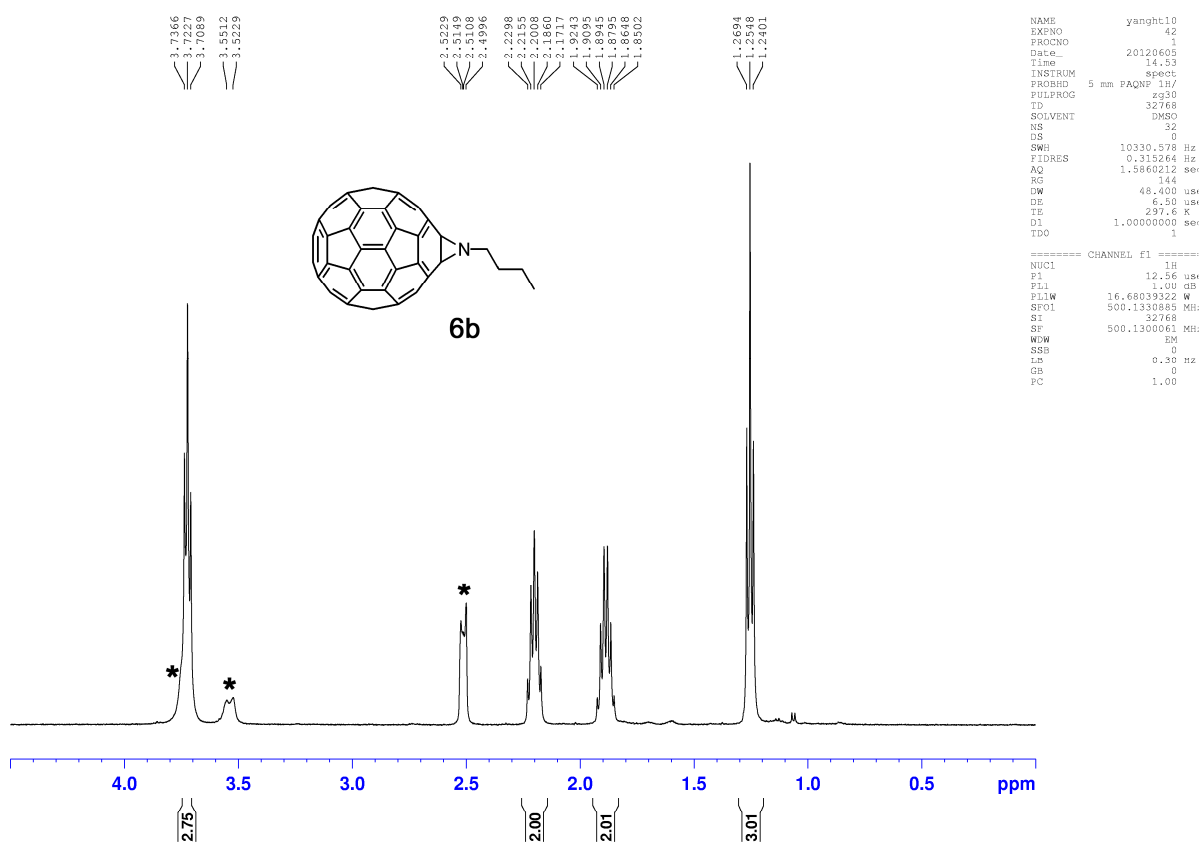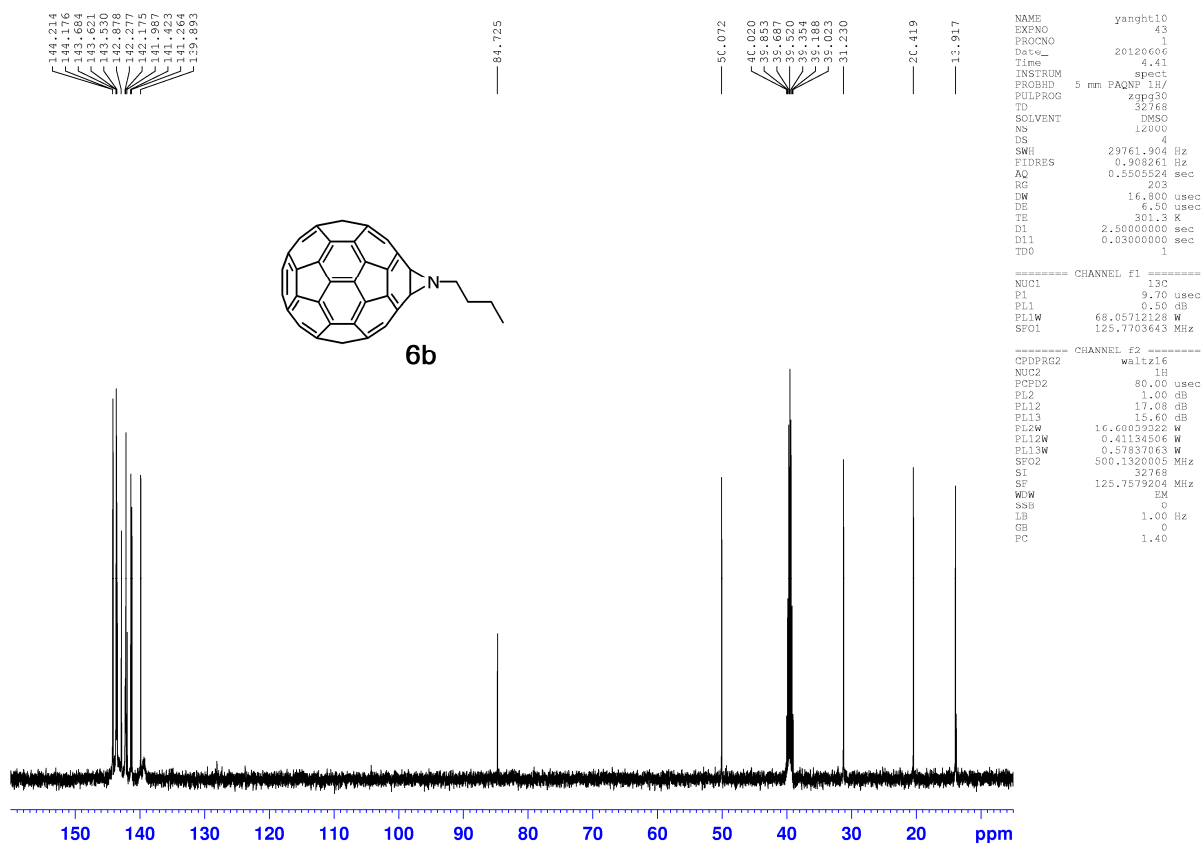



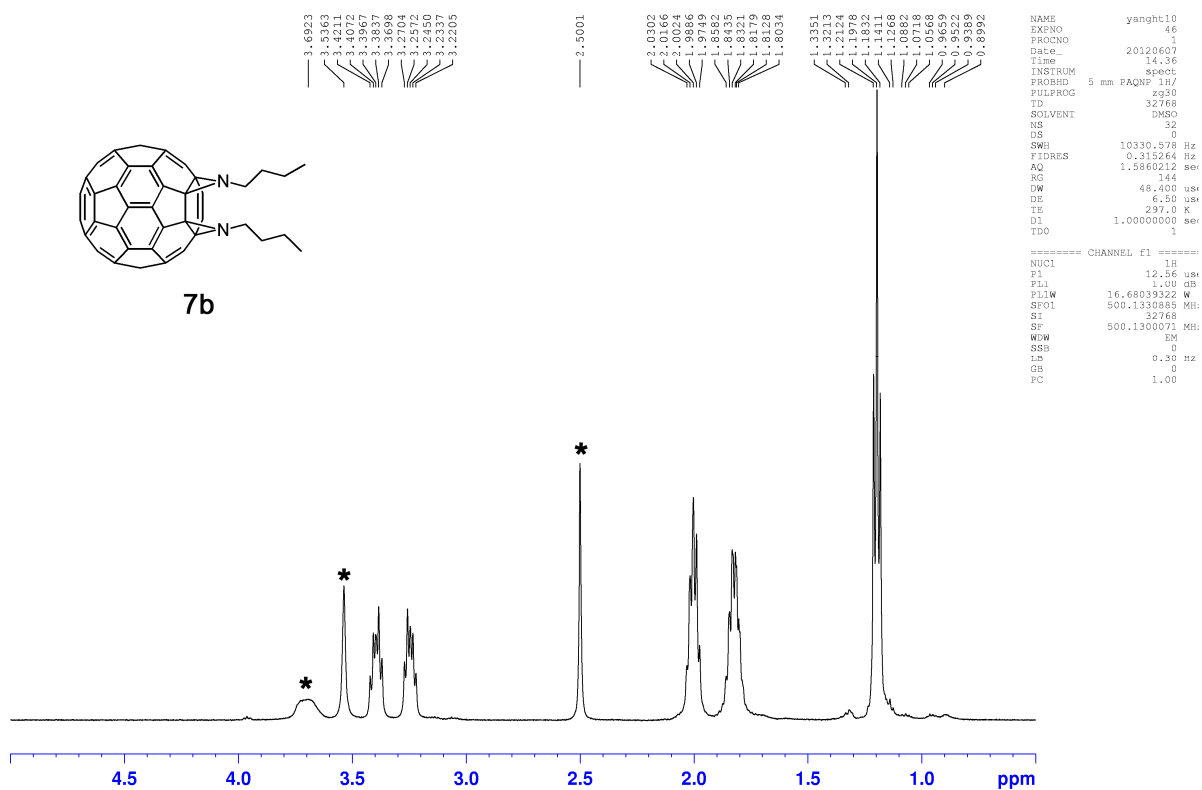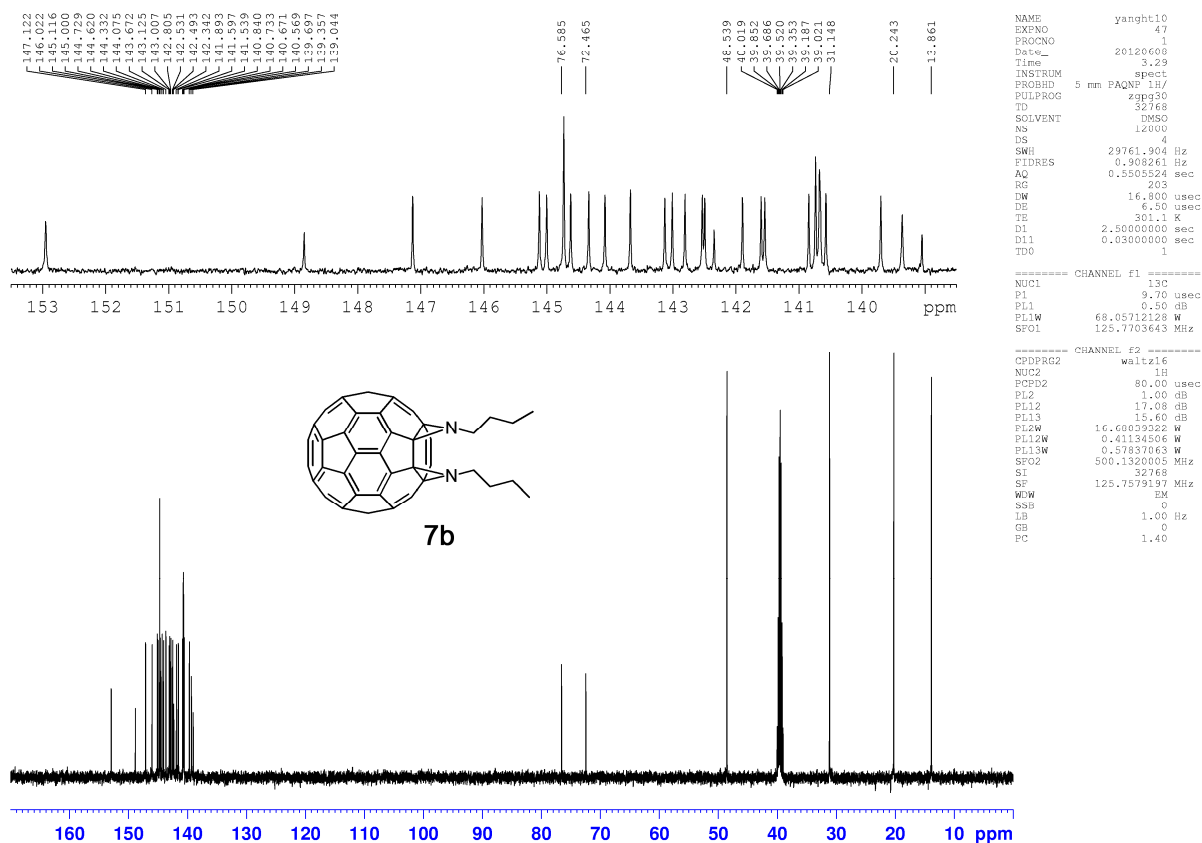

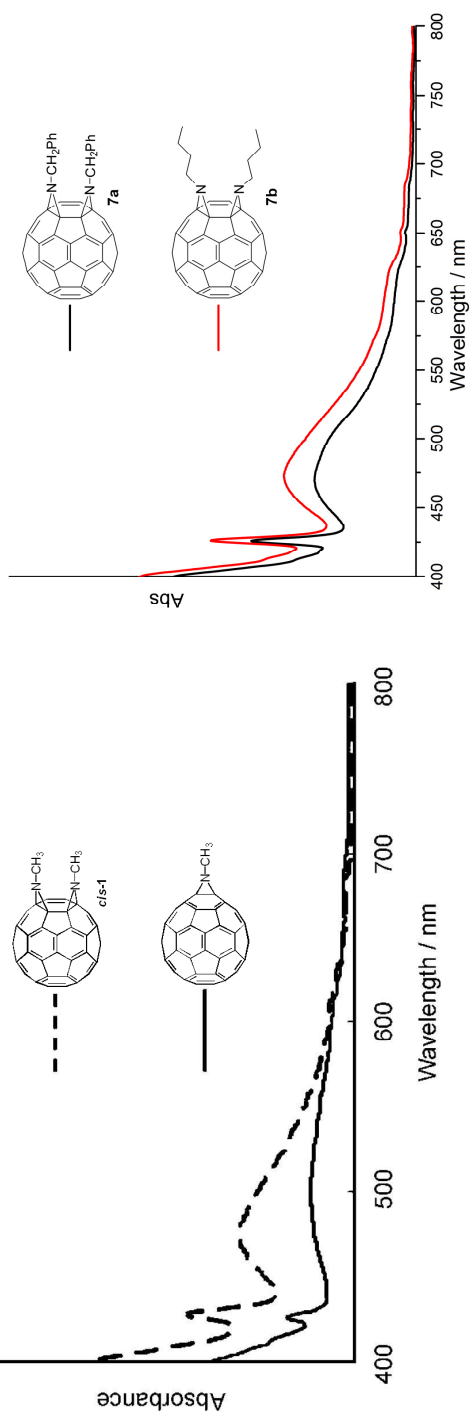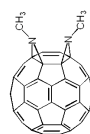

ODCB-*d*<sub>6</sub>

Chem. Asian J. 2011, 6, 416-423

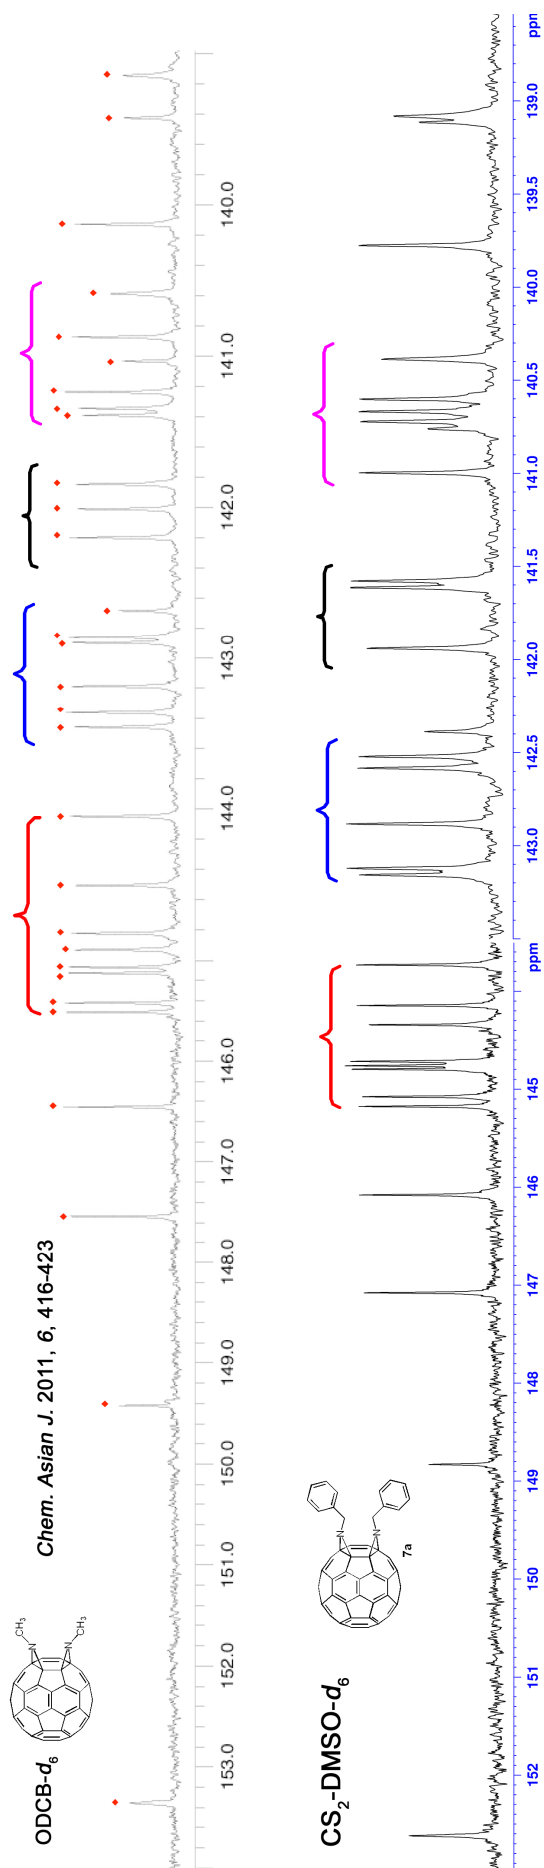

Relative energies of the eight isomers of 7a at the level of B3LYP/6-31G\*//AM1 (Energies are given in kcal/mol)

| Species         | Energies (kcal/mol) |
|-----------------|---------------------|
| <i>cis</i> -1   | 0.00                |
| <i>cis</i> -2   | 7.80                |
| <i>cis</i> -3   | 6.81                |
| <i>e</i>        | 4.34                |
| <i>trans</i> -1 | 5.16                |
| <i>trans</i> -2 | 4.89                |
| <i>trans</i> -3 | 4.59                |
| <i>trans</i> -4 | 5.15                |

As seen from the Table, *cis*-1 isomer is the most stable product, which is more stable than the second stable *e*-isomer by lower 4.34 kcal/mol, thus explaining the preferred formation of *cis*-1 isomer.

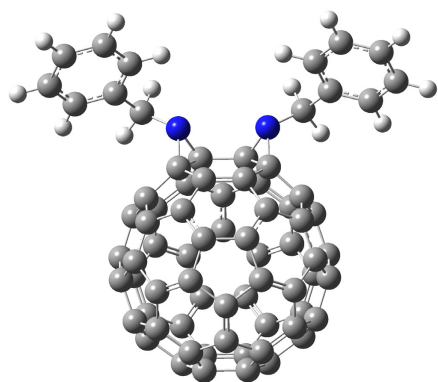

*cis*-1 isomer

Total energy = -2937.5286073 Hartrees

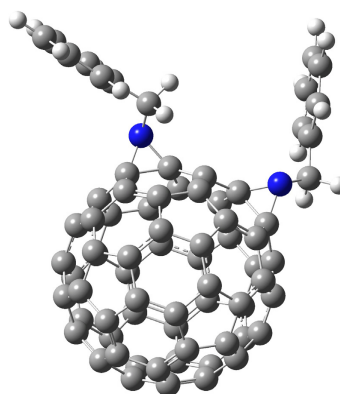

*cis* -2 isomer

Total energy = -2937.5161808 Hartrees

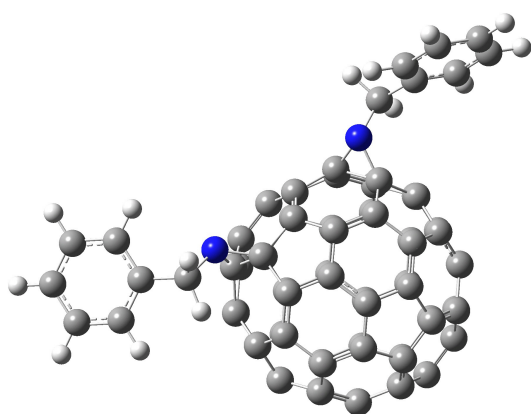

*cis*-3 isomer

Total energy = -2937.5177545 Hartrees

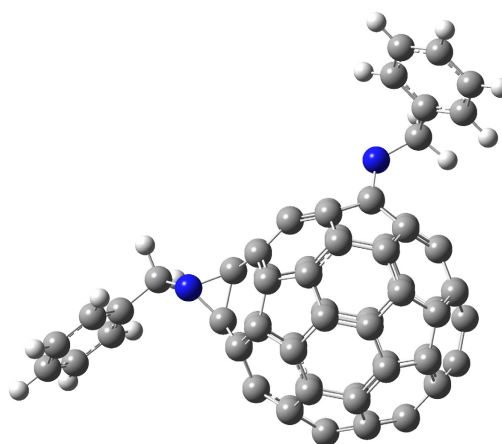

*e*- isomer

Total energy = -2937.5216861 Hartrees

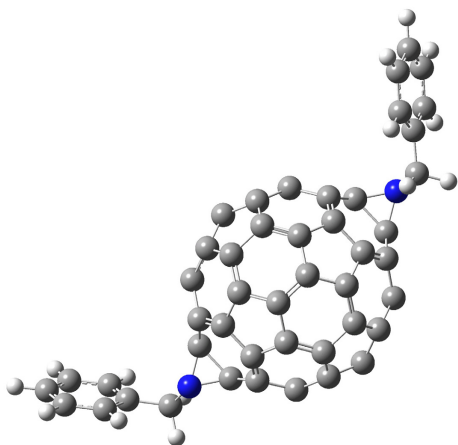

*trans*-1 isomer

Total energy = -2937.5203884 Hartrees

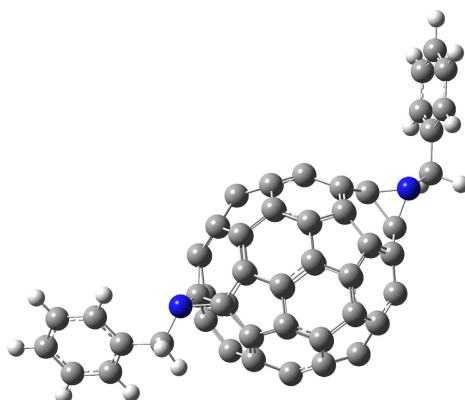

*trans*-2 isomer

Total energy = -2937.5208125 Hartrees

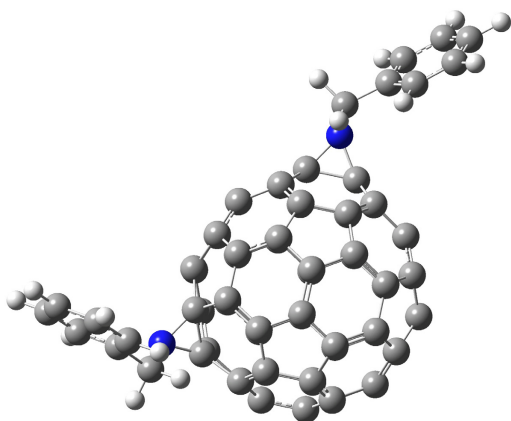

*trans*-3 isomer

Total energy = -2937.5212916 Hartrees

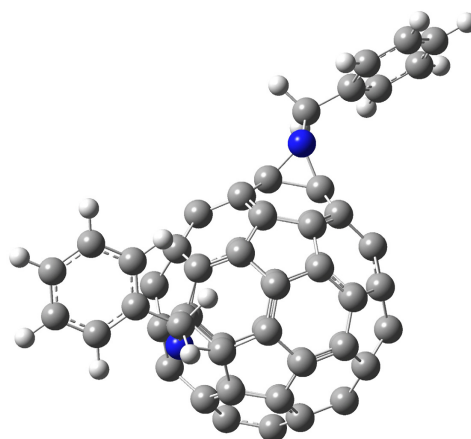

*trans*-4 isomer

Total energy = -2937.5203975 Hartrees
